# Supplementary material for: Common Genetic Risk Factors in ASD and ADHD Co-occurring Families
Source: bioRxiv or medRxiv preprint supplement (doi:10.1101/2022.05.15.22275109), 2022-05-16
Supplement: Supplementary file [file media-1.pdf]

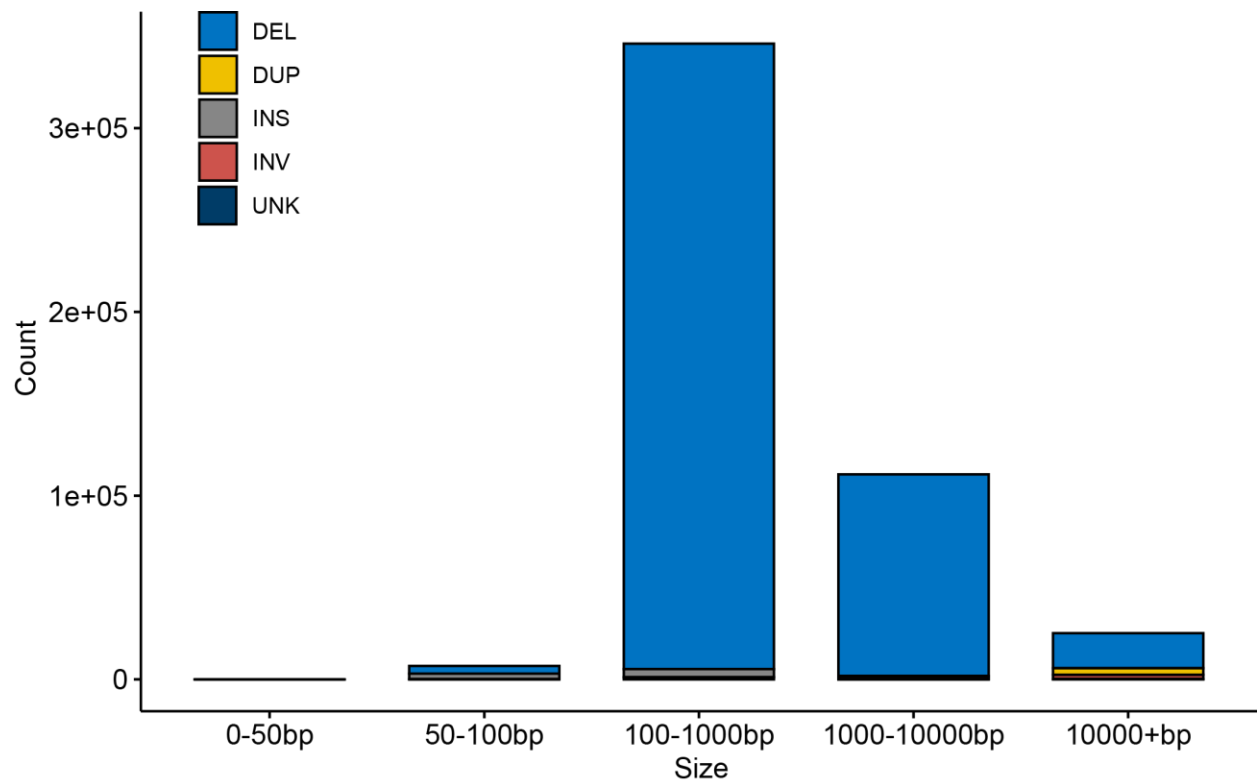

**Figure S1. Size distribution of SVs.** SV types: DEL: deletion; DUP: duplication; INS: insertion; INV: inversion, UNK: other types, including interspersed duplication (IDP) and intra-chromosomal translocation (ITX).
